# Supplementary material
Source: PubMed Central journal article supplement (PMC2438413)
Supplement: 0712027105_Supplemental_PDF.pdf [file 0712027105_Supplemental_PDF.pdf]

# Supporting Information

González et al. 10.1073/pnas.0712027105

## SI Methods

**Transporters.** The low number of transporters was apparent in most of the main transporters families. Thus, together with *Pelagibacter ubique*, MED152 has the lowest number of ATP-dependent transporters [a majority belonging to the ATP-binding Cassette (ABC) superfamily] of the marine bacteria sequenced so far (Table 1). The same holds true for the secondary transporters, which account for 50–70% of the transporters in the marine bacterial genomes sequenced until now. MED152 has only a total of 62 secondary transporters – similar to the number found in *Pelagibacter ubique* – while other bacteria may have from 100–200. In particular, the number of transporters in the drug/metabolite transporter (DMT) superfamily and in the major facilitator superfamily [MFS; used for transport of a diverse set of “small solutes in response to chemiosmotic ion gradients” (1)] was low, while the number of multidrug/oligosaccharidyl-lipid/polysaccharide (MOP) flippase superfamily transporters was similar to that in other marine bacteria (despite its smaller genome).

Like *Pelagibacter ubique*, MED152 (and other marine flavobacteria) lacks phosphotransferase system (PTS) genes for active transport of sugars. PTS genes are present in all major bacterial groups except cyanobacteria and epsilonproteobacteria (2). The lack thereof is consistent with the aerobic lifestyle of MED152 (PTS are particularly important for sugar uptake under anaerobic conditions).

**Comparative Analysis of Transporters.** Transporter families in MED152 were compared to the following marine genomes in the TransportDB database (details on transporter families and substrate specificity of particular transporters in specific bacteria are available at [www.membranetransport.org](http://www.membranetransport.org)): alphaproteobacteria *Bradyrhizobium japonicum* USDA 110, “*Candidatus Pelagibacter ubique*” HTCC1062, *Caulobacter crescentus* CB15, *Hyphomonas neptunium* ATCC 15444, *Jannaschia* sp. CCS1, *Loktanella vestfoldensis* SKA53, *Maricaulis maris* MCS10, *Roseobacter* sp. MED193, *Roseobacter* sp. TM1040, *Roseovarius nubinhibens* ISM, and *Silicibacter pomeroyi* DSS-3; gammaproteobacteria *Aeromonas hydrophila* subsp. *hydrophila* ATCC 7966, *E. coli* K12-MG1655, *Marinomonas* sp. MED121, *Photobacterium profundum* SS9, *Pseudoalteromonas haloplanktis* TAC125, *Pseudomonas aeruginosa* PAO1, *Shewanella oneidensis* MR-1, and *Vibrio* sp. MED222; Bacteroidetes/Chlorobi phylum *Bacteroides fragilis* NCTC9343, *Bacteroides fragilis* YCH46, *Bacteroides*

*thetaiotaomicron* VPI-5482, *Chlorobium tepidum* TLS, *Dokdonia* sp. MED134, *Leeuwenhoekella blandensis* MED217, and *Polaribacter* sp. MED152; and Firmicutes *Bacillus subtilis* 168.

**Bicarbonate Uptake.** For the bicarbonate uptake experiment, MED152 was grown at 16°C in Marine Broth (Difco) diluted 1:8 with artificial seawater (35 practical salinity units, prepared from Sea Salts; Sigma) in light ( $180 \mu\text{mol photons m}^{-2} \text{s}^{-1}$ ) or dark conditions (duplicate 200 ml cultures in each condition). Cultures were maintained without shaking to reduce aggregation and flock formation. After 50 h incubation (during exponential growth), four subsamples from one culture of each incubation condition (light and dark) were transferred to 25 ml glass bottles. From each original incubation condition, two subsamples (treated as duplicates) were placed in transparent bottles and two subsamples were placed in dark bottles (bottles covered with aluminum foil and black plastic). All bottles were then incubated under white light ( $180 \mu\text{mol photons m}^{-2} \text{s}^{-1}$ ; no light entered the dark bottles) for 2 h with  $20 \mu\text{l}$  of  $\text{H}^{14}\text{CO}_3^-$  (3  $\mu\text{Ci}$ ; DHI). Controls from each treatment were treated with 10% trichloroacetic acid (final concentration). After incubation, 3 ml aliquots from each replicate bottle were filtered through  $0.2 \mu\text{m}$  pore size filters (25 mm diameter, Supor-200, Pall), and the filters were exposed to HCl 0.7 M fumes for 2 h. Finally, the filters were placed in vials with 10 ml scintillation mixture (Perkin-Elmer) and kept at least 24 h in the dark before counting. Bicarbonate uptake rates were calculated according to the standard radioactive carbon assimilation technique procedure (3). At the time of the experiment, bacterial abundance was  $\approx 5.1 \times 10^8$  cells  $\text{ml}^{-1}$ , as determined by epifluorescence microscopy of SYBR Gold stained cells.

**Pigment Analysis.** MED152 was grown in Marine Broth 2216 (Difco) and filtered onto Whatman GF/F filters. Pigments were extracted by placing the filters in 3 ml of 90% acetone (with 0.01% of butylated hydroxytoluene to prevent chlorophyll al- lomerization) and vortexing them vigorously for 45 s. After 24 h at  $-20^\circ\text{C}$ , samples were sonicated for 1 min and vortexed again for 45 s. The extracts were cleared by filtration through Poretics  $0.8 \mu\text{m}$  polycarbonate filters. For pigment chromatography, 150  $\mu\text{l}$  of a mixture of 0.5 ml extract plus 0.1 ml  $\text{H}_2\text{O}$  was injected into a Thermo HPLC system and run under the conditions described in ref. 4. Standards of myxoxanthophyll, zeaxanthin and  $\beta$ -carotene (DHI) were used for pigment identification and quantification.

1. Pao SS, Paulsen IT, Saier MH (1998) Major facilitator superfamily. *Microbiol Mol Biol Rev* 62:1–34.
2. Barabote RD, Saier MH (2005) Comparative genomic analyses of the bacterial phosphotransferase system. *Microbiol Mol Biol Rev* 69:608–634.
3. Parsons TR, Maita Y, Lalli CM (1984) *A Manual of Chemical and Biological Methods for Seawater Analysis* (Pergamon Press, Oxford, UK).
4. Latasa M, et al. (2001) Losses of chlorophylls and carotenoids in aqueous acetone and methanol extracts prepared for RPHPLC analysis of pigments. *Chromatographia* 53:385–391.

5. Thompson JD, Higgins DG, Gibson TJ (1994) CLUSTAL W: Improving the sensitivity of progressive multiple sequence alignment through sequence weighting, position-specific gap penalties and weight matrix choice. *Nucleic Acids Res* 22:4673–4680.
6. Castresana J (2000) Selection of conserved blocks from multiple alignments for their use in phylogenetic analysis. *Mol Biol Evol* 17:540–552.
7. Felsenstein J (1989) PHYLIP—Phylogeny Inference Package (Version 3.2). *Cladistics* 5:164–166.

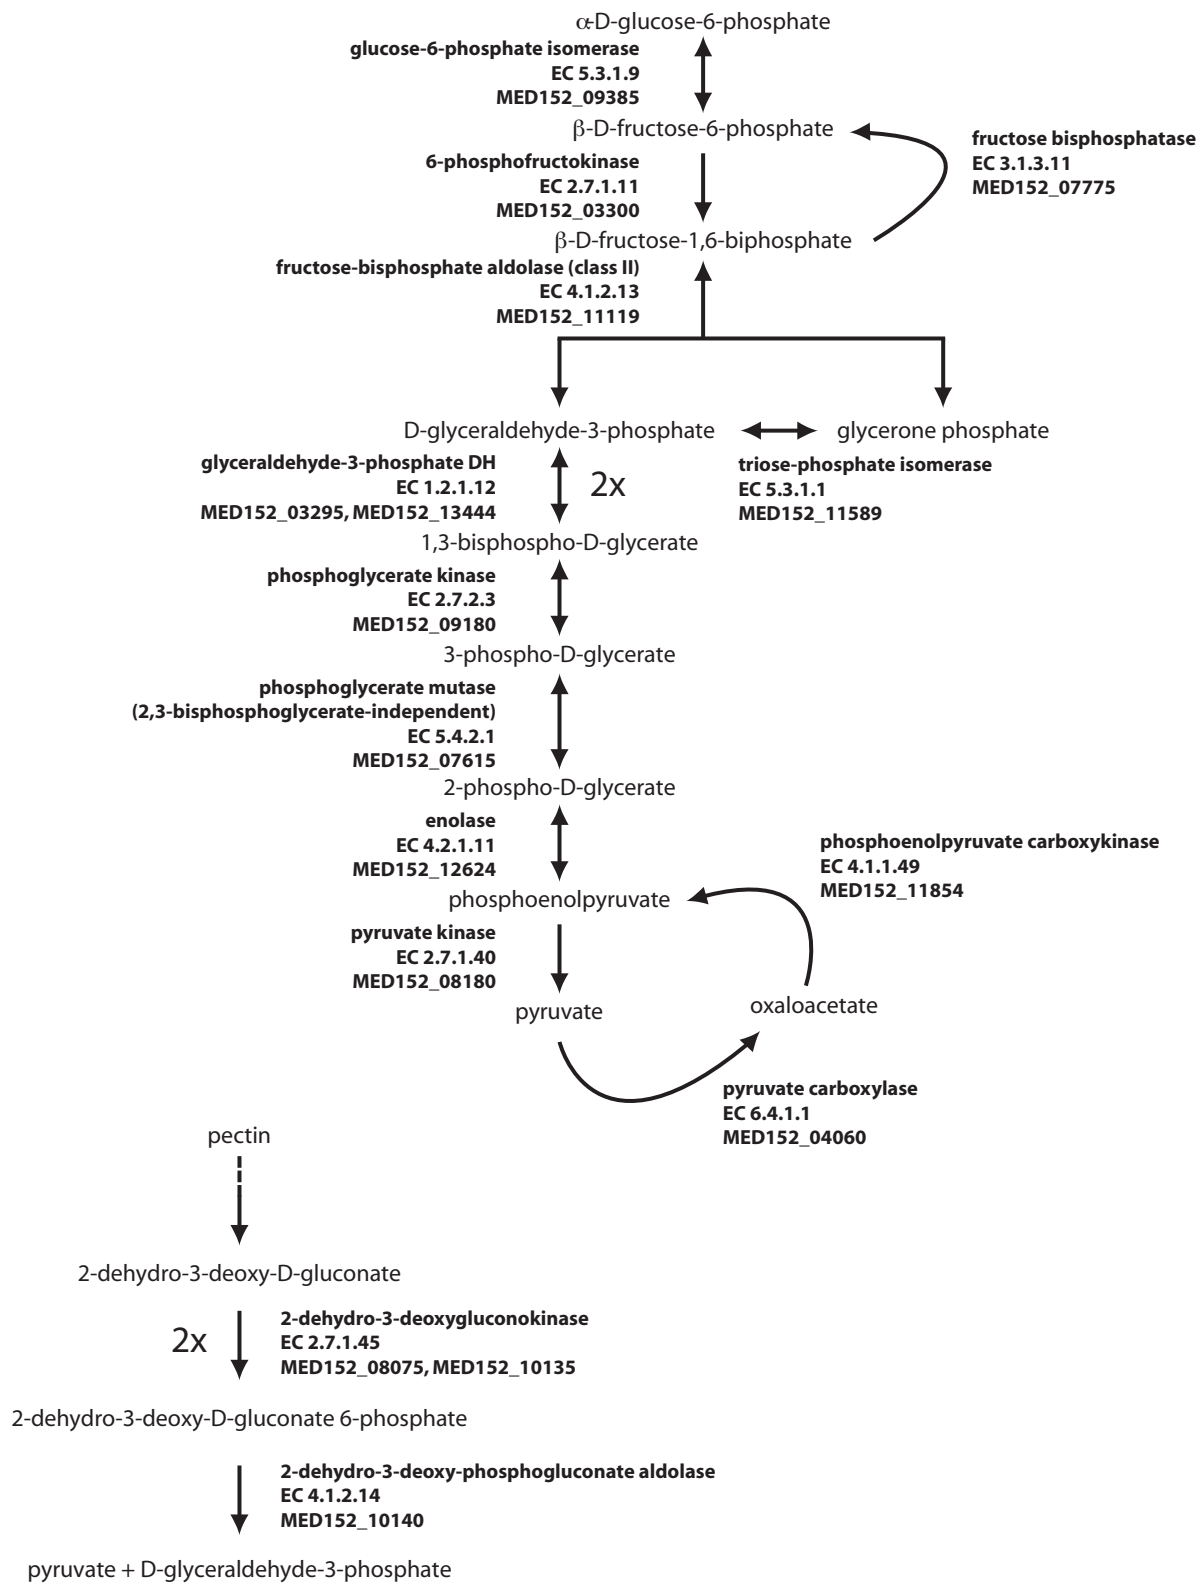

Fig. S1. Glycolysis/gluconeogenesis.

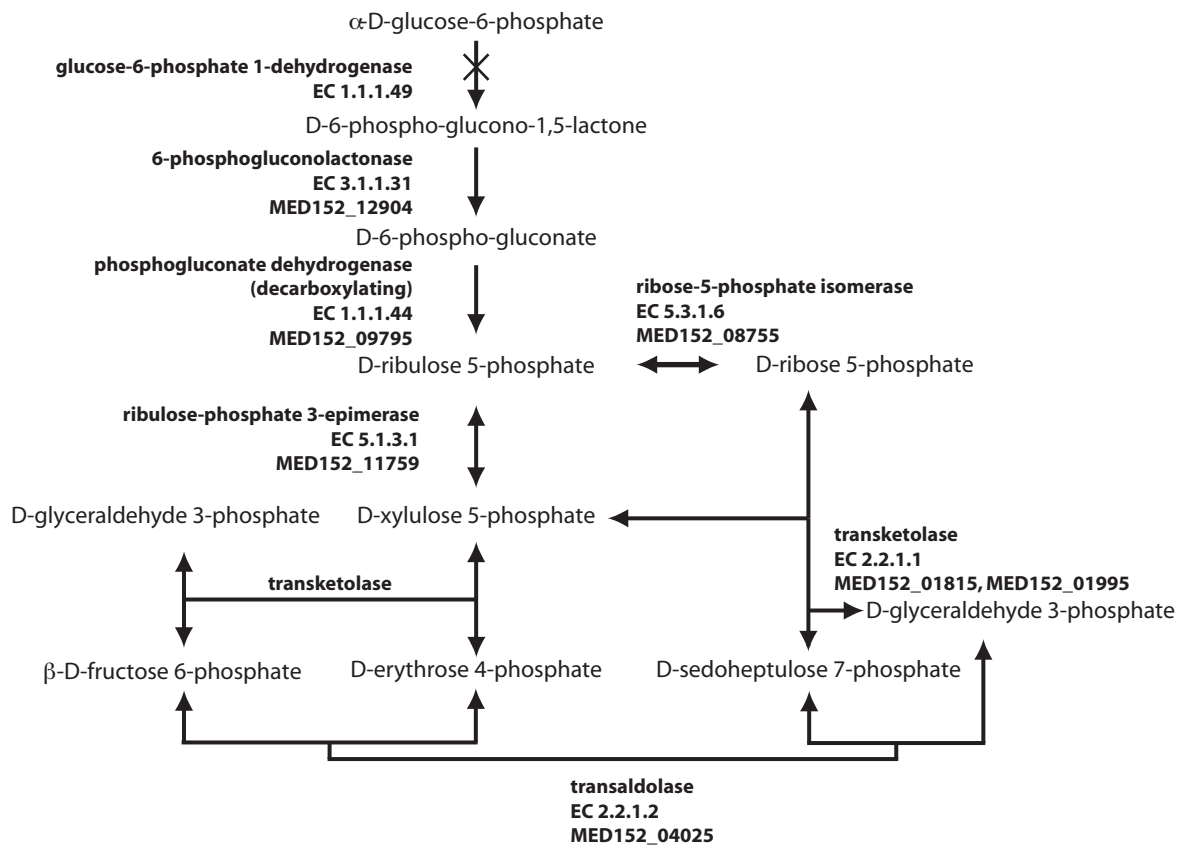

Fig. S2. Pentose phosphate pathway.

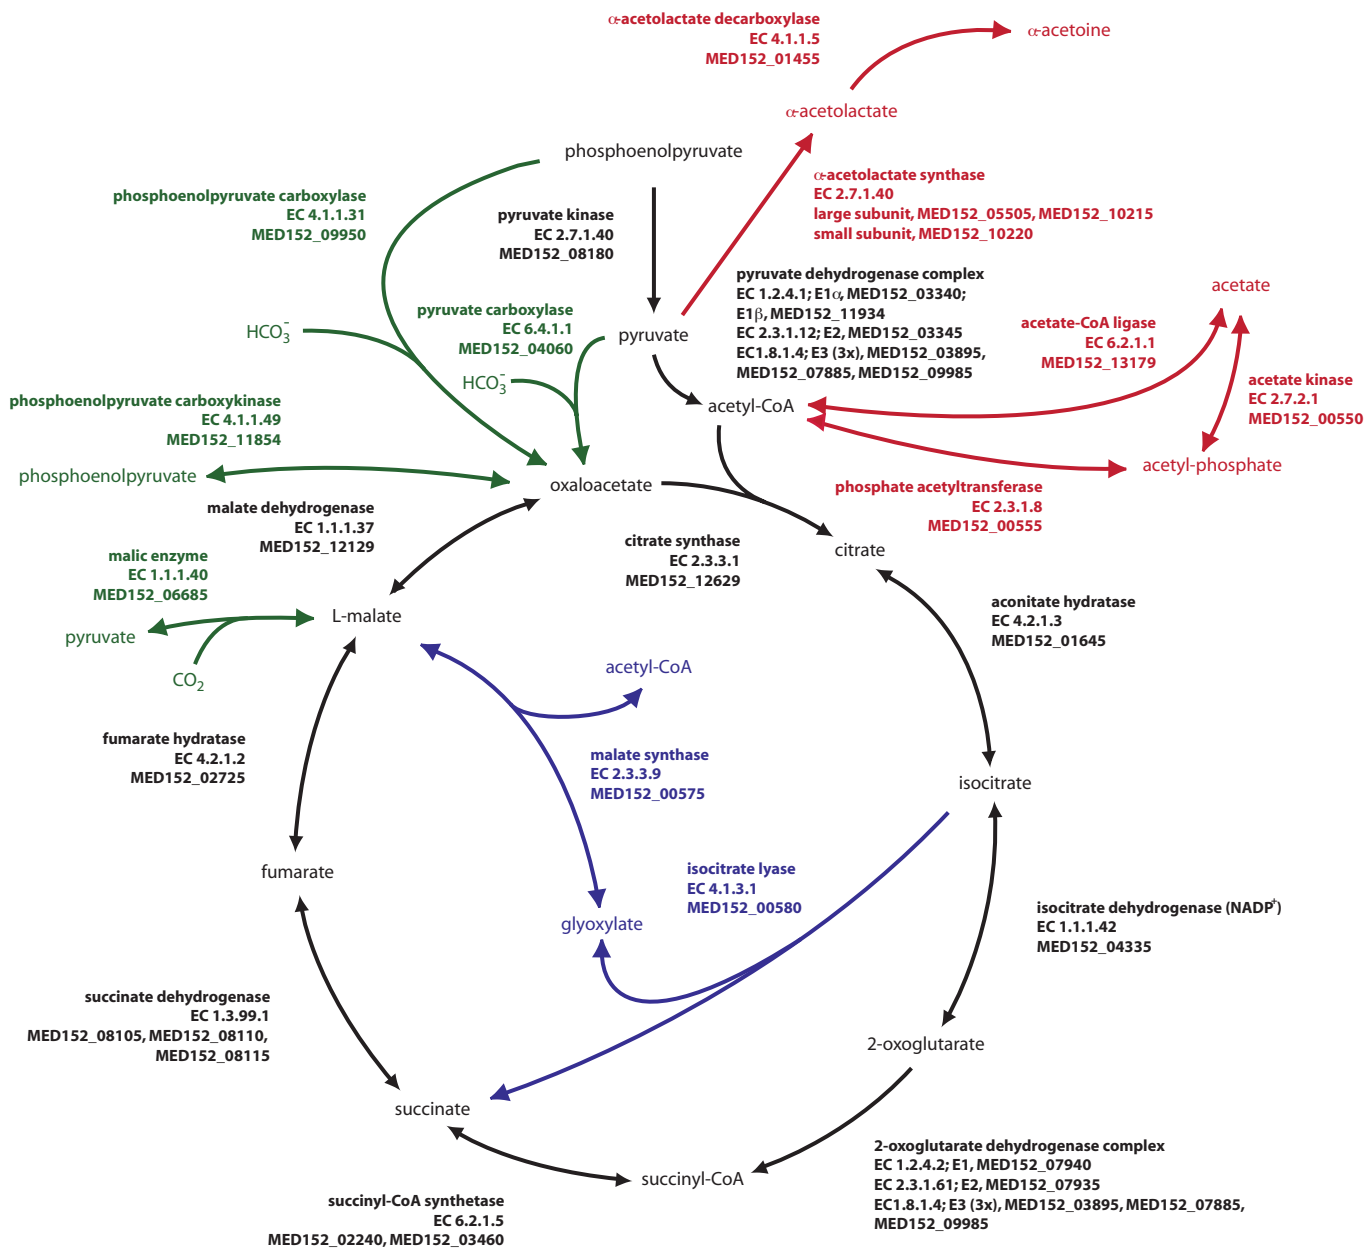

Fig. S3. TCA cycle and glyoxylate shunt.



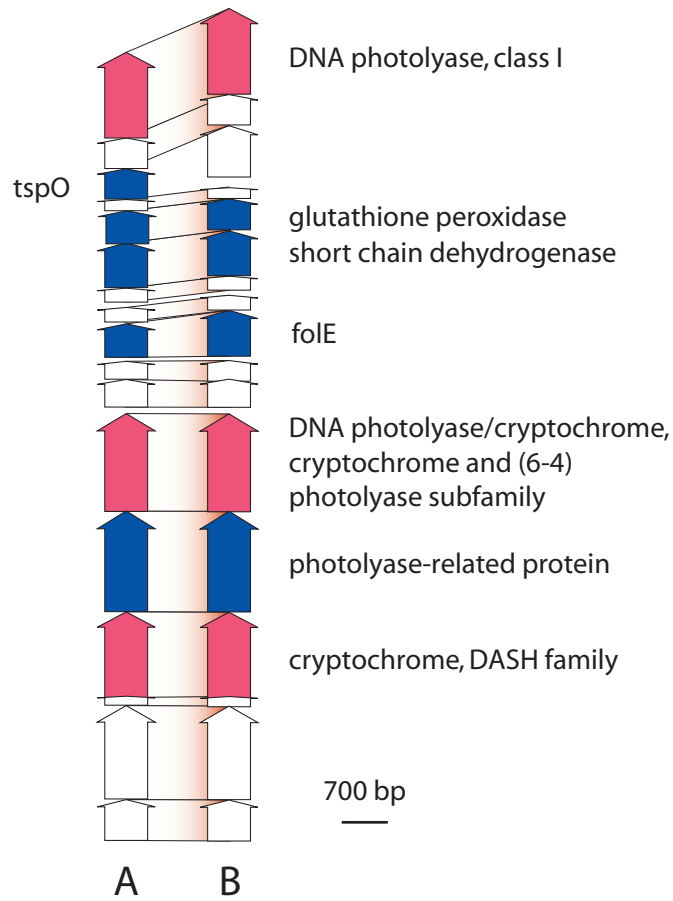

**Fig. S5.** *Polaribacter irgensii* 23-P (A) and *Polaribacter* sp. MED152 (B) gene clusters that contain the three copies of the DNA photolyase/cryptochrome genes (in red). Genes in white are conserved hypothetical. TspO is a Trp-rich sensory protein that acts as a transcriptional regulator and is only found in the genome of *Polaribacter irgensii* 23-P but not in MED152.







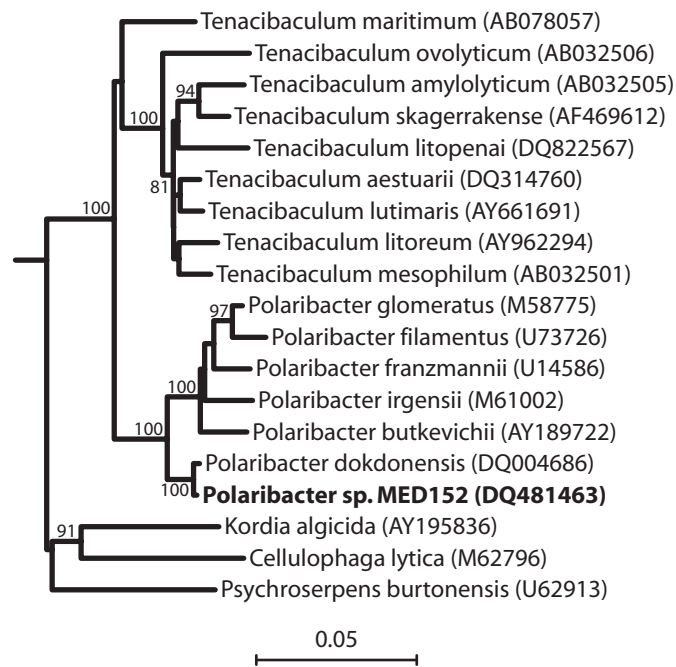

**Fig. S8.** Neighbor-joining phylogenetic tree based on 16S rRNA gene sequences of MED152 and closely related type strains for each species. A multiple alignment was constructed with the software package CLUSTAL W (Version 1.83; ref. 5). The alignment was edited with Gblocks (Version 0.91b) to identify conserved regions (6) with a minimum block of 10 and without gaps. The tree was constructed based on a Jukes-Cantor distance matrix and the Neighbor-Joining method using the PHYLIP package (Version 3.2) (7). The sequence of *Cytophaga hutchinsonii* (M58768) served as the outgroup. Bootstrap values greater than 70% confidence are shown at branching points (percentage of 1,000 resamplings). GenBank accession numbers are given in parentheses. The scale bar represents Jukes-Cantor distance.

**Table S1. Summary of MED152 genome**

| Parameter                                        | Value     |
|--------------------------------------------------|-----------|
| No. of bp                                        | 2,967,150 |
| GC content, %                                    | 30.61     |
| Coding density, %                                | 92.6      |
| No. of predicted protein-coding genes            | 2,646     |
| No. of predicted proteins with putative function | 1,750     |
| No. of conserved hypothetical proteins           | 593       |
| No. of unknown proteins unique to MED152         | 303       |
| No. of tRNAs                                     | 37        |
| No. of <i>rrn</i>                                | 3         |

**Table S2. Key enzymes and metabolic pathways identified in MED152**

| Pathway/enzyme (gene copy when greater than one)                                 | ORFs                                                                                                                                                                                                                                           |
|----------------------------------------------------------------------------------|------------------------------------------------------------------------------------------------------------------------------------------------------------------------------------------------------------------------------------------------|
| <b>Main pathways</b>                                                             |                                                                                                                                                                                                                                                |
| Pyruvate carboxylase. Anaplerotic pathway                                        | MED152_04060                                                                                                                                                                                                                                   |
| PEP carboxylase. Anaplerotic pathway                                             | MED152_09950                                                                                                                                                                                                                                   |
| Glyoxylate bypass. Anaplerotic pathway                                           | MED152_00580 ( <i>aceA</i> ), MED152_00575 ( <i>aceB</i> )                                                                                                                                                                                     |
| Malic enzyme. Anaplerotic pathway                                                | MED152_06685                                                                                                                                                                                                                                   |
| Phosphate acetyltransferase. Acetate metabolism                                  | MED152_00555                                                                                                                                                                                                                                   |
| Acetate kinase. Acetate metabolism                                               | MED152_00550                                                                                                                                                                                                                                   |
| Acetate CoA ligase. Acetate metabolism                                           | MED152_13179                                                                                                                                                                                                                                   |
| Acyl-CoA dehydrogenase. $\beta$ -Oxidation (8)                                   | MED152_01705, MED152_04870, MED152_05285, MED152_05295, MED152_05785, MED152_07525, MED152_07535, MED152_10560                                                                                                                                 |
| Enoyl-CoA hydratase. $\beta$ -Oxidation (4)                                      | MED152_05285, MED152_06790, MED152_09440, MED152_11649                                                                                                                                                                                         |
| Electron transfer protein. $\beta$ -Oxidation                                    | MED152_11949 ( <i>etfA</i> ), MED152_11944 ( <i>etfB</i> )                                                                                                                                                                                     |
| Glycerol kinase. Lipid degradation                                               | MED152_08680                                                                                                                                                                                                                                   |
| Glycerol-3-phosphate dehydrogenase (NAD(P) <sup>+</sup> ). Lipid degradation (2) | MED152_05430, MED152_08715                                                                                                                                                                                                                     |
| FAD-linked glycerol-3-phosphate dehydrogenase. Lipid degradation                 | MED152_08690                                                                                                                                                                                                                                   |
| Glycogen biosynthesis                                                            | MED152_05855 ( <i>glgA</i> ), MED152_05860 ( <i>glgC</i> ), MED152_05865, MED152_05870, MED152_05875 ( <i>glgB</i> ), MED152_05880, MED152_05885                                                                                               |
| <b>Electron transport chain</b>                                                  |                                                                                                                                                                                                                                                |
| Na <sup>+</sup> -translocating NADH:quinone oxidoreductase                       | MED152_11704 ( <i>nqrA</i> ), MED152_11709 ( <i>nqrB</i> ), MED152_11714 ( <i>nqrC</i> ), MED152_11719 ( <i>nqrD</i> ), MED152_11724 ( <i>nqrE</i> ), MED152_11729 ( <i>nqrF</i> )                                                             |
| Type II NADH dehydrogenase (FAD-dependent)                                       | MED152_12814                                                                                                                                                                                                                                   |
| Succinate dehydrogenase                                                          | MED152_08110 ( <i>sdhA</i> ), MED152_08115 ( <i>sdhB</i> ), MED152_08105 ( <i>sdhC</i> )                                                                                                                                                       |
| Cytochrome c oxidase                                                             | MED152_10275 ( <i>coxM</i> ), MED152_10280 ( <i>coxN</i> ), MED152_06775 ( <i>coxO</i> ), MED152_06770 ( <i>coxP</i> )                                                                                                                         |
| Cytochrome oxidase, cbb3 type                                                    | MED152_03190 ( <i>ccoNO</i> ), MED152_03195 ( <i>ccoS</i> )                                                                                                                                                                                    |
| Cytochrome c class I                                                             | MED152_10265                                                                                                                                                                                                                                   |
| Cytochrome c                                                                     | MED152_10245                                                                                                                                                                                                                                   |
| Cytochrome c assembly protein                                                    | MED152_05520                                                                                                                                                                                                                                   |
| Cytochrome oxidase assembly protein                                              | MED152_06660                                                                                                                                                                                                                                   |
| Cytochrome oxidase assembly factor                                               | MED152_06780                                                                                                                                                                                                                                   |
| 60 KD inner membrane protein OxaA homolog                                        | MED152_13299                                                                                                                                                                                                                                   |
| SenC (3)                                                                         | MED152_03785, MED152_06550, MED152_06755                                                                                                                                                                                                       |
| <b>Nitrogen assimilation</b>                                                     |                                                                                                                                                                                                                                                |
| Glutamate synthase                                                               | MED152_05815 ( <i>gltB</i> ), MED152_05820 ( <i>gltD</i> )                                                                                                                                                                                     |
| Ammonium channel ( <i>amtB</i> ) (2)                                             | MED152_05800, MED152_05810                                                                                                                                                                                                                     |
| Nitrogen regulatory protein P-II                                                 | MED152_05805                                                                                                                                                                                                                                   |
| Glutamine synthetase, type II                                                    | MED152_05925                                                                                                                                                                                                                                   |
| Glutamine synthetase, type III                                                   | MED152_05920                                                                                                                                                                                                                                   |
| Glutamate dehydrogenase                                                          | MED152_08660                                                                                                                                                                                                                                   |
| <b>Phosphate metabolism</b>                                                      |                                                                                                                                                                                                                                                |
| Phosphate permease                                                               | MED152_09510                                                                                                                                                                                                                                   |
| Polyphosphate kinase (3)                                                         | MED152_00300, MED152_00305, MED152_05065                                                                                                                                                                                                       |
| Exopolyphosphatase                                                               | MED152_04590                                                                                                                                                                                                                                   |
| H <sup>+</sup> -translocating pyrophosphatase                                    | MED152_11924                                                                                                                                                                                                                                   |
| Soluble pyrophosphatase                                                          | MED152_11929                                                                                                                                                                                                                                   |
| <b>Sulfur assimilation</b>                                                       |                                                                                                                                                                                                                                                |
| APS/PAPS pathway                                                                 | MED152_06170 ( <i>cysD</i> ), MED152_06175 ( <i>cysH</i> ), MED152_06165 ( <i>cysN</i> ), MED152_06160 ( <i>cysI</i> ), MED152_09765 ( <i>cysJ</i> ), MED152_00895 ( <i>cysK</i> ), MED152_06130 ( <i>cysM</i> ), MED152_06135 ( <i>cysE</i> ) |
| Sulphate permease (3)                                                            | MED152_09030, MED152_10290, MED152_12914                                                                                                                                                                                                       |
| <b>Iron assimilation</b>                                                         |                                                                                                                                                                                                                                                |
| Fe <sup>3+</sup> -binding periplasmic protein (2)                                | MED152_01595, MED152_11574                                                                                                                                                                                                                     |
| ABC-type Fe <sup>3+</sup> -siderophore transporter (2)                           | MED152_00690, MED152_00695                                                                                                                                                                                                                     |
| Mn <sup>2+</sup> /Fe <sup>2+</sup> transporter, NRAMP family (2)                 | MED152_03840, MED152_11859                                                                                                                                                                                                                     |
| Ferritin-like protein (2)                                                        | MED152_01695, MED152_03075                                                                                                                                                                                                                     |
| ATP-dependent Fe <sup>2+</sup> transport system FeoAB                            | MED152_06540, MED152_06545                                                                                                                                                                                                                     |
| Fur (2)                                                                          | MED152_00170, MED152_01940                                                                                                                                                                                                                     |
| Repressor                                                                        | MED152_10760                                                                                                                                                                                                                                   |
| <b>Bicarbonate uptake</b>                                                        |                                                                                                                                                                                                                                                |
| SulP type transporter (BicA)                                                     | MED152_09030                                                                                                                                                                                                                                   |
| SbtA                                                                             | MED152_03855                                                                                                                                                                                                                                   |
| Carbonic anhydrase                                                               | MED152_09035                                                                                                                                                                                                                                   |

The following additional pathways were complete and are not shown on the table: glycolysis, gluconeogenesis, TCA cycle, pentose phosphate pathway, purine biosynthesis and salvage, pyrimidine biosynthesis and salvage, thymidylate biosynthesis, amino acid metabolism, fatty acid biosynthesis, NAD biosynthesis, riboflavin and FAD biosynthesis, siroheme biosynthesis, quinone biosynthesis, H<sup>+</sup>-ATPase, pyridoxal phosphate biosynthesis, pantothenate and CoA biosynthesis. Complete cobalamine, biotin and thiamine biosynthetic pathways were not found. Entner–Doudoroff pathway is incomplete.

**Table S3. Key stress response-related genes in MED152**

| Pathway/protein (copy number when greater than one)                                           | Type of stress                                   | ORFs                                                                                                                                                                                                                                          |
|-----------------------------------------------------------------------------------------------|--------------------------------------------------|-----------------------------------------------------------------------------------------------------------------------------------------------------------------------------------------------------------------------------------------------|
| Glycine betaine biosynthesis<br>OsmC (2)                                                      | Osmotic                                          | MED152.05190 ( <i>betA</i> ), MED152.04445 ( <i>betB</i> )<br>MED152.04480, MED152.07905                                                                                                                                                      |
| Large Conductance Mechanosensitive Ion Channel<br>(MscL) family (2)                           | Osmotic                                          | MED152.07755*, MED152.08290*                                                                                                                                                                                                                  |
| Small Conductance Mechanosensitive Ion Channel<br>(MscS) family (6)                           | Osmotic                                          | MED152.03080*, MED152.05265*, MED152.06730*,<br>MED152.10700*, MED152.11349*, MED152.12279*                                                                                                                                                   |
| Voltage-Gated K <sup>+</sup> Channel superfamily (2)                                          | Osmotic                                          | MED152.01430*, MED152.04890*                                                                                                                                                                                                                  |
| K <sup>+</sup> uptake protein TrkH                                                            | Osmotic                                          | MED152.12369*                                                                                                                                                                                                                                 |
| Monovalent Cation:Proton Antiporter-2 (CPA2) family<br>K <sup>+</sup> transporter             | Osmotic                                          | MED152.02125*                                                                                                                                                                                                                                 |
| Cl <sup>-</sup> Channel (ClC) family                                                          | Osmotic                                          | MED152.07855*                                                                                                                                                                                                                                 |
| ATP-Binding Cassette (ABC) type Na <sup>+</sup> transporter (3)                               | Osmotic                                          | MED152.05270*, MED152.05275*, MED152.13214*                                                                                                                                                                                                   |
| Phage shock protein C (PspC)                                                                  | Osmotic/cryoprotection                           | MED152.03405                                                                                                                                                                                                                                  |
| Fatty acid desaturase (3)                                                                     | Cryoprotection                                   | MED152.06405, MED152.06505, MED152.09405                                                                                                                                                                                                      |
| NhaC Na <sup>+</sup> :H <sup>+</sup> Antiporter (NhaC) family (2)                             | Internal pH regulation/Na <sup>+</sup> extrusion | MED152.06020*, MED152.08675*                                                                                                                                                                                                                  |
| NhaD Na <sup>+</sup> :H <sup>+</sup> Antiporter (NhaD) family                                 | Internal pH regulation/Na <sup>+</sup> extrusion | MED152.05770*                                                                                                                                                                                                                                 |
| Monovalent Na <sup>+</sup> /H <sup>+</sup> Antiporter-1 (CPA1) family (2)                     | Internal pH regulation/Na <sup>+</sup> extrusion | MED152.02960*, MED152.03050*                                                                                                                                                                                                                  |
| Sterol desaturase (3)                                                                         | Cryoprotection                                   | MED152.02375, MED152.07040, MED152.10110                                                                                                                                                                                                      |
| DEAD box RNA helicase (12)                                                                    | Cryoprotection                                   | MED152.00240, MED152.01675, MED152.01850,<br>MED152.02405, MED152.02435, MED152.02810,<br>MED152.03055, MED152.03355, MED152.07660,<br>MED152.08085, MED152.10165, MED152.13039                                                               |
| Cold-shock DNA-binding protein (3)                                                            | Cryoprotection                                   | MED152.01260, MED152.02750, MED152.06655                                                                                                                                                                                                      |
| Stationary-phase survival acid phosphatase SurE                                               | Starvation                                       | MED152.06290                                                                                                                                                                                                                                  |
| Guanosine polyphosphate (ppGpp)<br>pyrophosphohydrolase/synthetase                            | Starvation                                       | MED152.01945                                                                                                                                                                                                                                  |
| Phosphate starvation-inducible protein, PhoH                                                  | Starvation                                       | MED152.13139                                                                                                                                                                                                                                  |
| Catalase                                                                                      | Oxidative                                        | MED152.05245                                                                                                                                                                                                                                  |
| Cu/Zn superoxide dismutase                                                                    | Oxidative                                        | MED152.04650                                                                                                                                                                                                                                  |
| Fe/Mn superoxide dismutase                                                                    | Oxidative                                        | MED152.07780                                                                                                                                                                                                                                  |
| Cytochrome-c peroxidase (2)                                                                   | Oxidative                                        | MED152.03805, MED152.08020                                                                                                                                                                                                                    |
| Protein-Met-S-oxide reductase, type A (3)                                                     | Oxidative                                        | MED152.03040, MED152.07435, MED152.07450                                                                                                                                                                                                      |
| Protein-Met-S-oxide reductase, type B (2)                                                     | Oxidative                                        | MED152.01175, MED152.07430                                                                                                                                                                                                                    |
| Glutathione peroxidase                                                                        | Oxidative                                        | MED152.05385                                                                                                                                                                                                                                  |
| AhpC/TSA family protein (3)                                                                   | Oxidative                                        | MED152.02100, MED152.05240, MED152.09055                                                                                                                                                                                                      |
| Redoxin (16)                                                                                  | Oxidative                                        | MED152.00520, MED152.00525, MED152.01395,<br>MED152.01805, MED152.01910, MED152.03415,<br>MED152.05235, MED152.06110, MED152.06230,<br>MED152.06900, MED152.07620, MED152.08425,<br>MED152.10120, MED152.10405, MED152.10550,<br>MED152.11584 |
| Arsenate oxidoreductase ArsC (3)                                                              | Metals                                           | MED152.00320, MED152.02710, MED152.07715                                                                                                                                                                                                      |
| Arsenite resistance protein ArsB                                                              | Metals                                           | MED152.02140                                                                                                                                                                                                                                  |
| Heavy metal transport/detoxification protein (2)                                              | Metals                                           | MED152.09525, MED152.11224                                                                                                                                                                                                                    |
| MerTP Mercuric Ion (Hg <sup>2+</sup> ) Permease (MerTP) family<br>transporter                 | Metals                                           | MED152.00110*                                                                                                                                                                                                                                 |
| Arsenical Resistance-3 (ACR3) family transporter                                              | Metals                                           | MED152.02140*                                                                                                                                                                                                                                 |
| Mn <sup>2+</sup> Transporter (Nramp) family (2)                                               | Metals                                           | MED152.03840*, MED152.11859*                                                                                                                                                                                                                  |
| Integral membrane protein TerC family (2)                                                     | Metals                                           | MED152.01215, MED152.13169                                                                                                                                                                                                                    |
| β-Lactamase (8)                                                                               | Drugs                                            | MED152.03350, MED152.03530, MED152.07260,<br>MED152.07965, MED152.08005, MED152.09070,<br>MED152.10295, MED152.10385                                                                                                                          |
| Chloramphenicol acetyltransferase                                                             | Drugs                                            | MED152.03570                                                                                                                                                                                                                                  |
| ATP-Binding Cassette (ABC) type transporter (4)                                               | Drugs                                            | MED152.00590*, MED152.00620*, MED152.11514*,<br>MED152.13184*                                                                                                                                                                                 |
| Major Facilitator Superfamily (MFS) transporter (2)                                           | Drugs                                            | MED152.08705*, MED152.11639*                                                                                                                                                                                                                  |
| Multidrug/Oligosaccharidyl-lipid/Polysaccharide<br>(MOP) Flippase superfamily transporter (3) | Drugs                                            | MED152.01915*, MED152.02820*, MED152.09425*                                                                                                                                                                                                   |
| Resistance-Nodulation-Cell Division (RND) superfamily<br>transporter                          | Drugs                                            | MED152.08525*                                                                                                                                                                                                                                 |

ORFs with an asterisk also appear in Table S8 showing transporters.

Table S4. Genes coding for replication, repair, and recombination mechanisms in MED152

| Gene name   | ORFs                                                                                                                                                                   | Protein description; pathway                                             |
|-------------|------------------------------------------------------------------------------------------------------------------------------------------------------------------------|--------------------------------------------------------------------------|
| <i>uvrA</i> | MED152_01780, MED152_04900                                                                                                                                             | ATPase, DNA binding; nucleotide excision repair                          |
| <i>uvrB</i> | MED152_03455                                                                                                                                                           | Helicase; nucleotide excision repair                                     |
| <i>uvrC</i> | MED152_09500                                                                                                                                                           | Nuclease; nucleotide excision repair                                     |
| <i>uvrD</i> | MED152_01615, MED152_10775                                                                                                                                             | UvrD/REP helicase; nucleotide excision repair                            |
| <i>mfd</i>  | MED152_10740                                                                                                                                                           | Transcription-repair coupling factor; nucleotide excision repair         |
| <i>ung</i>  | MED152_00800                                                                                                                                                           | Uracyl DNA glycosylase; base-excision repair                             |
| <i>nth</i>  | MED152_01800, MED152_09640                                                                                                                                             | HhH-GPD superfamily; base excision repair                                |
| <i>tag</i>  | MED152_11989                                                                                                                                                           | DNA-3-methyladenine glycosidase I; base excision repair                  |
| <i>xth</i>  | MED152_10450                                                                                                                                                           | Exodeoxyribonuclease III; base excision repair                           |
|             | MED152_00700                                                                                                                                                           | Non-canonical purine NTP pyrophosphatase, rdgB/HAM1 family; DNA repair   |
| <i>radA</i> | MED152_08245                                                                                                                                                           | DNA repair protein RadA/Sms                                              |
| <i>radC</i> | MED152_12379                                                                                                                                                           | DNA repair protein RadC                                                  |
| <i>mutL</i> | MED152_01325                                                                                                                                                           | DNA mismatch repair protein                                              |
| <i>mutS</i> | MED152_00795, MED152_08905, MED152_09620                                                                                                                               | DNA mismatch repair protein                                              |
| <i>recA</i> | MED152_08735                                                                                                                                                           | Recombinase; DNA recombination                                           |
| <i>recD</i> | MED152_00290                                                                                                                                                           | ATP-dependent exoDNAse (exonuclease V), alpha subunit; DNA recombination |
| <i>recF</i> | MED152_01345                                                                                                                                                           | DNA replication; DNA recombination                                       |
| <i>recJ</i> | MED152_07910                                                                                                                                                           | Single-stranded-DNA-specific exonuclease; DNA degradation                |
| <i>recN</i> | MED152_13259                                                                                                                                                           | DNA repair protein RecN                                                  |
| <i>recO</i> | MED152_10500                                                                                                                                                           | Recombination protein RecO                                               |
| <i>recR</i> | MED152_04560                                                                                                                                                           | Recombination protein RecR                                               |
| <i>ruvA</i> | MED152_06690                                                                                                                                                           | DNA helicase RuvA; DNA recombination                                     |
| <i>ruvB</i> | MED152_10285, MED152_12424                                                                                                                                             | DNA helicase RuvB; DNA recombination                                     |
| <i>ruvC</i> | MED152_12024                                                                                                                                                           | Endodeoxyribonuclease RuvC; DNA recombination                            |
|             | MED152_00210, MED152_01115, MED152_02515, MED152_04860, MED152_07400, MED152_09890                                                                                     | DNA recombination                                                        |
| <i>cinA</i> | MED152_03985                                                                                                                                                           | Competence/DNA damage-inducible protein CinA                             |
|             | MED152_00230, MED152_02730, MED152_05735, MED152_07035, MED152_09645                                                                                                   | DNA binding protein                                                      |
| <i>polA</i> | MED152_10105                                                                                                                                                           | DNA polymerase I                                                         |
| <i>holA</i> | MED152_00675                                                                                                                                                           | DNA polymerase III, delta subunit                                        |
| <i>dnaA</i> | MED152_13404                                                                                                                                                           | Chromosomal replication initiator protein DnaA                           |
| <i>dnaB</i> | MED152_01985                                                                                                                                                           | DnaB replicative DNA helicase                                            |
| <i>dnaE</i> | MED152_07245, MED152_11814                                                                                                                                             | DNA polymerase III, alpha subunit                                        |
| <i>dnaG</i> | MED152_11074                                                                                                                                                           | DNA primase                                                              |
| <i>dnaN</i> | MED152_04670                                                                                                                                                           | DNA polymerase III, beta subunit                                         |
| <i>dnaQ</i> | MED152_01490, MED152_05060, MED152_11754                                                                                                                               | DNA polymerase III, epsilon subunit                                      |
| <i>dnaX</i> | MED152_03045                                                                                                                                                           | DNA polymerase III, subunit gamma/tau                                    |
| <i>holB</i> | MED152_09190                                                                                                                                                           | DNA polymerase III, delta' subunit                                       |
| <i>ligA</i> | MED152_13454                                                                                                                                                           | DNA ligase, NAD-dependent                                                |
| <i>topA</i> | MED152_11284                                                                                                                                                           | DNA topoisomerase I                                                      |
| <i>exc</i>  | MED152_01555                                                                                                                                                           | DNA topoisomerase III                                                    |
| <i>parC</i> | MED152_01590                                                                                                                                                           | DNA topoisomerase IV, subunit A                                          |
| <i>parE</i> | MED152_01585                                                                                                                                                           | DNA topoisomerase IV, subunit B                                          |
| <i>gyrA</i> | MED152_04790                                                                                                                                                           | DNA gyrase, subunit A                                                    |
| <i>gyrB</i> | MED152_12139                                                                                                                                                           | DNA gyrase, subunit B                                                    |
| <i>ssb</i>  | MED152_09160, MED152_09635                                                                                                                                             | Single-stranded DNA-binding protein                                      |
| <i>rnhB</i> | MED152_05995                                                                                                                                                           | Ribonuclease HII                                                         |
|             | MED152_09655                                                                                                                                                           | Ribonuclease, Rne/Rng family                                             |
| <i>mfd</i>  | MED152_10740                                                                                                                                                           | Transcription-repair coupling factor                                     |
| <i>dcm</i>  | MED152_07385                                                                                                                                                           | DNA (cytosine-5-)-methyltransferase; restriction/modification            |
| <i>ogt</i>  | MED152_07670                                                                                                                                                           | Methylated DNA-protein Cys methyltransferase                             |
|             | MED152_09340                                                                                                                                                           | 6-O-methylguanine DNA methyltransferase                                  |
|             | MED152_07920                                                                                                                                                           | Helicase                                                                 |
| <i>cspD</i> | MED152_01260, MED152_02750, MED152_06655                                                                                                                               | 'Cold-shock' DNA-binding protein                                         |
|             | MED152_01310, MED152_04910, MED152_07835, MED152_09660, MED152_11354                                                                                                   | Endonuclease/exonuclease/phosphatase family protein                      |
|             | MED152_00240, MED152_01675, MED152_01850, MED152_02405, MED152_02435, MED152_02810, MED152_03055, MED152_03355, MED152_07660, MED152_08085, MED152_10165, MED152_13039 | DEAD/DEAH box helicase                                                   |
|             | MED152_05340, MED152_05350, MED152_05405                                                                                                                               | DNA photolyase/cryptochrome                                              |
|             | MED152_12919, MED152_13194                                                                                                                                             | NUDIX hydrolase; base-excision repair                                    |



**Table S6. Domains and peptides with a putative role in light absorption and response**

| Domain/peptide                                                               | ORFs                                                                 | Function                                                                                      |
|------------------------------------------------------------------------------|----------------------------------------------------------------------|-----------------------------------------------------------------------------------------------|
| <b>Light sensing</b>                                                         |                                                                      |                                                                                               |
| Phytochrome region                                                           | MED152_00100                                                         | Red and far-red light sensor; chromophore is a linear tetrapyrrole bound via a Cys residue    |
| PAS and PAC domains                                                          | MED152_00100, MED152_03150, MED152_04250, MED152_06325               | Flavin-binding; component of phytochromes; sensor of oxygen, redox and light                  |
| GAF domain                                                                   | MED152_00100, MED152_02465, MED152_03150, MED152_05910, MED152_11204 | Binds small-molecules (cAMP or cGMP) that act as second messengers; component of phytochromes |
| DNA photolyase/cryptochrome, animal cryptochrome and (6–4) photolyase family | MED152_05350                                                         | Flavin-binding; senses short wavelengths of visible light                                     |
| Cryptochrome, DASH family                                                    | MED152_05340                                                         | Flavin-binding; senses short wavelengths of visible light                                     |
| Deoxyribodipyrimidine photo-lyase, class I                                   | MED152_05405                                                         | Flavin-binding; senses short wavelengths of visible light                                     |
| BLUF domain                                                                  | MED152_08960                                                         | Flavin-binding; blue light sensor                                                             |
| <b>Synthesis of <math>\beta</math>-carotene</b>                              |                                                                      |                                                                                               |
| Isopentenyl-diphosphate delta-isomerase ( <i>idi</i> )                       | MED152_03605                                                         | Synthesis of $\beta$ -carotene from isopentenyl diphosphate and dimethylallyl diphosphate     |
| Farnesyl-diphosphate synthase ( <i>ispA</i> )                                | MED152_07135 or MED152_08510                                         |                                                                                               |
| Geranylgeranyl diphosphate synthase ( <i>crtE</i> )                          | MED152_07135 or MED152_08510                                         |                                                                                               |
| Phytoene synthase ( <i>crtB</i> )                                            | MED152_02670                                                         |                                                                                               |
| Phytoene desaturase ( <i>crtI</i> )                                          | MED152_02575 or MED152_02675                                         |                                                                                               |
| Lycopene $\beta$ -cyclase ( <i>crtY</i> )                                    | MED152_02660                                                         |                                                                                               |
| 15,15'- $\beta$ -Carotene dioxygenase ( <i>blh</i> )                         | MED152_12849                                                         | Final step in the synthesis of retinal from $\beta$ -carotene                                 |
| <b>Synthesis of proteorhodopsin apoprotein</b>                               |                                                                      |                                                                                               |
| Opsin                                                                        | MED152_12844                                                         |                                                                                               |
| <b>Additional carotenoids</b>                                                |                                                                      |                                                                                               |
| Spheroidene monooxygenase ( <i>crtA</i> )                                    | MED152_02580                                                         |                                                                                               |
| Methoxyneurosporene dehydrogenase ( <i>crtD</i> )                            | MED152_02575 or MED152_02675                                         |                                                                                               |
| $\beta$ -Carotene hydroxylase ( <i>crtZ</i> )                                | MED152_02565 or MED152_02665                                         | Synthesis of zeaxanthin from $\beta$ -carotene                                                |

**Table S7. Distribution of putative light sensors in proteorhodopsin-containing marine bacteria (as defined in Table S5)**

| Organism                              | BLUF | Phytochrome | Animal cryptochrome and (6-4) photolyase family | Cryptochrome, DASH family | Photolyase, class I |
|---------------------------------------|------|-------------|-------------------------------------------------|---------------------------|---------------------|
| <i>Polaribacter</i> sp. MED152        | +    | +           | +                                               | +                         | +                   |
| <i>Polaribacter irgensii</i> 23-P     | -    | -           | ++                                              | +                         | +                   |
| <i>Dokdonia</i> sp. MED134            | +    | +           | +                                               | +                         | +                   |
| <i>Flavobacterium</i> BAL38           | -    | -           | +                                               | +                         | +                   |
| <i>P. ubiqua</i> HTCC1002             | -    | -           | -                                               | -                         | +                   |
| <i>P. ubiqua</i> HTCC1062             | -    | -           | -                                               | -                         | +                   |
| <i>Octadecabacter antarcticus</i> 307 | -    | -           | +                                               | -                         | +                   |
| Methylophilales HTCC2181              | -    | -           | -                                               | +                         | +                   |
| <i>Vibrio harveyi</i> ATCC BAA-1116   | -    | -           | +                                               | +                         | +                   |
| <i>Vibrio</i> sp. S14                 | -    | -           | +                                               | +                         | +                   |
| HTCC2143                              | -    | -           | +                                               | +                         | +                   |
| HTCC2207                              | -    | -           | -                                               | +                         | +                   |
| <i>Photobacterium</i> sp. SKA34       | -    | -           | +                                               | +                         | +                   |
| <i>Marinobacter</i> sp. ELB17         | -    | -           | ++                                              | +                         | +                   |

Presence of light sensors are predicted by hits to specific PFAMs or TIGRFAMs. DNA photolyase/cryptochrome subfamilies are based on phylogenetic analysis as in Fig. S6, as well as on custom-built PFAMs. Of 80 Moore genomes, 30 contain at least one BLUF domain, 18 contain at least one phytochrome domain, and 12 contain three cryptochrome/photolyase peptides (most contain one or two and no other contain four cryptochrome/photolyase peptides).



**Table S8. Transporters identified in the genome of MED152**

| Substrate                                      | Type of transporter                                                                           | ORFs                                                                               |
|------------------------------------------------|-----------------------------------------------------------------------------------------------|------------------------------------------------------------------------------------|
|                                                | <b>Ion channels</b>                                                                           |                                                                                    |
| Cl <sup>-</sup>                                | Chloride Channel (ClC) family                                                                 | MED152.07855                                                                       |
| Mg <sup>2+</sup> /Co <sup>2+</sup>             | CorA Metal Ion Transporter (MIT) family                                                       | MED152.12054                                                                       |
|                                                | Large Conductance Mechanosensitive Ion Channel (MscL) family                                  | MED152.07755, MED152.08290                                                         |
|                                                | Small Conductance Mechanosensitive Ion Channel (MscS) family                                  | MED152.03080, MED152.05265, MED152.06730, MED152.10700, MED152.11349, MED152.12279 |
| K <sup>+</sup>                                 | Voltage-Gated Ion Channel (VIC) superfamily                                                   | MED152.01430, MED152.04890                                                         |
|                                                | <b>ATP-Binding Cassette (ABC) superfamily</b>                                                 |                                                                                    |
| bacitracin                                     |                                                                                               | MED152.00590                                                                       |
| multidrug                                      |                                                                                               | MED152.00620                                                                       |
| Fe <sup>3+</sup>                               |                                                                                               | MED152.00695, MED152.01595, MED152.11574                                           |
| unknown                                        |                                                                                               | MED152.01685                                                                       |
| unknown                                        |                                                                                               | MED152.02455                                                                       |
| unknown                                        |                                                                                               | MED152.02840, MED152.02845, MED152.02850                                           |
| lipoprotein releasing                          |                                                                                               | MED152.03470, MED152.03875                                                         |
| lipid A export                                 |                                                                                               | MED152.04055                                                                       |
| lipoprotein releasing                          |                                                                                               | MED152.04345                                                                       |
| unknown                                        |                                                                                               | MED152.04415                                                                       |
| Na <sup>+</sup> efflux                         |                                                                                               | MED152.05270, MED152.05275                                                         |
| Fe-S assembly/SufBCD system                    |                                                                                               | MED152.07995, MED152.08000, MED152.08010                                           |
| cell division                                  |                                                                                               | MED152.12239                                                                       |
| lipoprotein releasing                          |                                                                                               | MED152.10825                                                                       |
| multidrug                                      |                                                                                               | MED152.11514                                                                       |
| toluene tolerance                              |                                                                                               | MED152.03275, MED152.12664, MED152.12669                                           |
| gliding motility                               |                                                                                               | MED152.11809                                                                       |
| gliding motility                               |                                                                                               | MED152.13119                                                                       |
| multidrug                                      |                                                                                               | MED152.13184                                                                       |
| Na <sup>+</sup> efflux                         |                                                                                               | MED152.13214                                                                       |
|                                                | <b>Membrane pyrophosphatase</b>                                                               |                                                                                    |
| H <sup>+</sup>                                 |                                                                                               | MED152.11924                                                                       |
|                                                | <b>P-type ATPase superfamily</b>                                                              |                                                                                    |
| Cu <sup>2+</sup>                               |                                                                                               | MED152.00135                                                                       |
| Zn <sup>2+</sup>                               |                                                                                               | MED152.00155                                                                       |
| Cation                                         |                                                                                               | MED152.03205                                                                       |
|                                                | <b>Secondary transporters</b>                                                                 |                                                                                    |
| H <sub>2</sub> AsO <sub>3</sub> <sup>-</sup>   | Arsenical Resistance-3 (ACR3) family                                                          | MED152.02140                                                                       |
| Na <sup>+</sup> /alanine                       | Ala or Gly:Cation Symporter (AGCS) family                                                     | MED152.04880                                                                       |
| NH <sub>4</sub> <sup>+</sup>                   | Ammonium Symporter (Amt) family                                                               | MED152.05800, MED152.05810                                                         |
| amino acid                                     | Amino Acid-Polyamine-Organocation (APC) family                                                | MED152.09705                                                                       |
| Na <sup>+</sup> /unknown                       | Bile Acid:Na <sup>+</sup> Symporter (BASS) family                                             | MED152.05040                                                                       |
| Na <sup>+</sup> /Ca <sup>2+</sup>              | Ca <sup>2+</sup> :Cation Antiporter (CaCA) family                                             | MED152.11634                                                                       |
| nucleosides                                    | Concentrative Nucleoside Transporter (CNT) family                                             | MED152.11959                                                                       |
| Na <sup>+</sup> /H <sup>+</sup>                | Monovalent Cation:Proton Antiporter-1 (CPA1) family                                           | MED152.02960, MED152.03050                                                         |
| K <sup>+</sup>                                 | Monovalent Cation:Proton Antiporter-2 (CPA2) family                                           | MED152.02125                                                                       |
| H <sup>+</sup> /Na <sup>+</sup> :glutamate     | Dicarboxylate/Amino Acid:Cation (Na <sup>+</sup> or H <sup>+</sup> ) Symporter (DAACS) family | MED152.02010                                                                       |
| Na <sup>+</sup> /dicarboxylate drug/metabolite | Divalent Anion:Na <sup>+</sup> Symporter (DASS) family                                        | MED152.09770                                                                       |
|                                                | Drug/Metabolite Transporter (DMT) Superfamily                                                 | MED152.02080, MED152.09260, MED152.09315, MED152.09530, MED152.10735               |
| H <sup>+</sup> /Na <sup>+</sup> :sugar         | Glycoside-Pentoside-Hexuronide (GPH):Cation Symporter family                                  | MED152.00365, MED152.00460, MED152.05120                                           |
| branched-chain amino acid                      | Branched Chain Amino Acid:Cation Symporter (LIVCS) family                                     | MED152.08060                                                                       |
| unknown                                        | Major Facilitator Superfamily (MFS)                                                           | MED152.01190, MED152.03745, MED152.05095                                           |
| nucleosides                                    | Major Facilitator Superfamily (MFS)                                                           | MED152.05175                                                                       |
| glucose/galactose                              | Major Facilitator Superfamily (MFS)                                                           | MED152.08460, MED152.13289                                                         |
| multidrug efflux                               | Major Facilitator Superfamily (MFS)                                                           | MED152.08705, MED152.11639                                                         |
| arabinose                                      | Major Facilitator Superfamily (MFS)                                                           | MED152.09090                                                                       |

| Substrate                                      | Type of transporter                                                            | ORFs                                     |
|------------------------------------------------|--------------------------------------------------------------------------------|------------------------------------------|
| hexuranate                                     | Major Facilitator Superfamily (MFS)                                            | MED152.09855                             |
| multidrug efflux                               | Multidrug/Oligosaccharidyl-lipid/<br>Polysaccharide (MOP) Flippase superfamily | MED152.01915, MED152.02820, MED152.09425 |
| oligosaccharide repeat unit                    | Multidrug/Oligosaccharidyl-lipid/<br>Polysaccharide (MOP) Flippase superfamily | MED152.03130, MED152.10600               |
| polysaccharide                                 | Multidrug/Oligosaccharidyl-lipid/<br>Polysaccharide (MOP) Flippase superfamily | MED152.04985                             |
| O-antigen                                      | Multidrug/Oligosaccharidyl-lipid/<br>Polysaccharide (MOP) Flippase superfamily | MED152.12399                             |
| Na <sup>+</sup> /H <sup>+</sup>                | NhaC Na <sup>+</sup> :H <sup>+</sup> Antiporter (NhaC) family                  | MED152.06020, MED152.08675               |
| Na <sup>+</sup> /H <sup>+</sup>                | NhaD Na <sup>+</sup> :H <sup>+</sup> Antiporter (NhaD) family                  | MED152.05770                             |
| Mn <sup>2+</sup>                               | Metal Ion (Mn <sup>2+</sup> -iron) Transporter (Nramp) family                  | MED152.03840, MED152.11859               |
| 60-kDa inner membrane protein OxaA homolog     | Cytochrome Oxidase Biogenesis (Oxa1) family                                    | MED152.13299                             |
| dipeptide/tripeptide: H <sup>+</sup>           | H <sup>+</sup> -dependent Oligopeptide Transporter (POT) family                | MED152.06255, MED152.06260               |
| amino acid                                     | Resistance to Homoserine/Thr (RhtB) family                                     | MED152.01410                             |
| Cu <sup>2+</sup> /Ag <sup>+</sup> efflux       | Resistance-Nodulation-Cell Division (RND) superfamily                          | MED152.00145                             |
| multidrug efflux                               | Resistance-Nodulation-Cell Division (RND) superfamily                          | MED152.08525                             |
| cation/multidrug efflux                        | Resistance-Nodulation-Cell Division (RND) superfamily                          | MED152.10530                             |
| unknown                                        | Resistance-Nodulation-Cell Division (RND) superfamily                          | MED152.11044                             |
| protein-export (SecDF)                         | Resistance-Nodulation-Cell Division (RND) superfamily                          | MED152.12119                             |
| Na <sup>+</sup> /HCO <sub>3</sub> <sup>-</sup> | Na <sup>+</sup> -dependent Bicarbonate Transporter (SBT) family                | MED152.03855                             |
| Na <sup>+</sup> /solute                        | Solute:Na <sup>+</sup> Symporter (SSS) family                                  | MED152.04565, MED152.04660, MED152.05085 |
| SO <sub>4</sub> <sup>=</sup>                   | SO <sub>4</sub> <sup>=</sup> Permease (SulP) family                            | MED152.09030, MED152.10290, MED152.12914 |
| protein export                                 | Twin Arginine Targeting (Tat) family                                           | MED152.02445, MED152.08785               |
| K <sup>+</sup>                                 | K <sup>+</sup> Transporter (Trk) family                                        | MED152.12369                             |
| <b>Unclassified transporters</b>               |                                                                                |                                          |
| Ca <sup>2+</sup>                               | Ca <sup>2+</sup> -ATPase                                                       | MED152.12659                             |
| Fe <sup>2+</sup>                               | Fe <sup>2+</sup> Uptake (FeoB) family                                          | MED152.06540                             |
| Hg <sup>2+</sup>                               | MerTP Mercuric Ion (Hg <sup>2+</sup> ) Permease (MerTP) family                 | MED152.00110                             |
| Mg <sup>2+</sup>                               | Mg <sup>2+</sup> Transporter-E (MgtE) family                                   | MED152.08915                             |
| nicotinamide mononucleotide                    | Nicotinamide Mononucleotide (NMN) Uptake Permease (PnuC) family                | MED152.09745                             |

**Table S9. Genes and domains with a potential role in adhesion**

| Domain                                 | ORFs                                                                                  | Protein family |
|----------------------------------------|---------------------------------------------------------------------------------------|----------------|
| Fasciclin                              | MED152_12639, MED152_13164                                                            | PF02469        |
| Thrombospondin type 3 repeat           | MED152_00310, MED152_03360, MED152_04530,<br>MED152_10785, MED152_07970               | PF02412        |
| Fibronectin type III                   | MED152_07970                                                                          | PF00041        |
| PKD                                    | MED152_00430, MED152_03360, MED152_04535,<br>MED152_04570, MED152_04575, MED152_09845 | PF00801        |
| FG-GAP                                 | MED152_05130, MED152_05135, MED152_05145,<br>MED152_08145                             | PF01839        |
| ASPIC and UnbV                         | MED152_05145, MED152_08145, MED152_13274                                              | PF07593        |
| Lectin C-type domain                   | MED152_07900                                                                          | PF00059        |
| Cadherin                               | MED152_00085                                                                          | IPR002126      |
| HYR                                    | MED152_00085                                                                          | PF02494        |
| Leu rich repeat                        | MED152_10960, MED152_11029                                                            | PF00560        |
| $\beta$ -Propellor repeat              | MED152_02285                                                                          | IPR013519      |
| Cellulose binding motif                | MED152_00085                                                                          | PF00553        |
| DUF11                                  | MED152_07970                                                                          | PF01345        |
| Von Willebrand factor type A           | MED152_08995, MED152_09005, MED152_09010                                              | PF00092        |
| Cna protein B-type                     | MED152_10890                                                                          | PF05738        |
| Carbohydrate binding domain            | MED152_00430, MED152_03360, MED152_04575,<br>MED152_09845, MED152_11564               | PF02018        |
| Carbohydrate binding module (family 6) | MED152_00755                                                                          | PF03422        |
| Cellulose binding domain               | MED152_00870                                                                          | PF00942        |
| DUF638                                 | MED152_03735                                                                          | PF04829        |
| F5/8 type C domain                     | MED152_08630, MED152_13279                                                            | PF00754        |
| Starch-binding domain                  | MED152_11969                                                                          | PF00686        |
